# Supplementary material
Source: PubMed Central journal article supplement (PMC1567670)
Supplement: pnas_0605210103_2.pdf [file pnas_0605210103_2.pdf]

*Drosophila melanogaster* AGO2 repeats at the N-terminus  
cDNA: NM\_140518

448 -GGTGGCCATCAGCAAGGACGACAAGGGCAAGAAGGTGGCTACCAACAGCGTCCGCTGGACAACAACAA  
517 -GGTGGCCATCAGCAAGGACGACAAGGGCAAGAAGGTGGCTACCAACAGCGTCCGCTGGACAACAACAA  
586 -GGTGGCCATCAGCAAGGACGACAAGGGCAAGAAGGTGGCTACCAACAGCGTCCGCTGGACAACAACAA  
655 -GGTGGCCATCAGCAAGGACGACAAGGGCAAGAAGGTGGCTACCAACAGCGTCCGCTGGACAACAACAA  
724 -GGTGGCCATCAGCAAGGACGACAAGGGCAAGAAGGTGGCTACCAACAGCGTCCGCTGGACAACAACAA  
793 -GGTGGCCATCAGCAAGGACGACAAGGGCAAGAAGGTGGCTACCAACAGCGTCCGCTGGACAACAACAA  
862 -GGTGGCCATCAGCAAGGACGACAAGGGCAAGAAGGTGGCTACCAACAGCGTCCGCTGGACAACAACAA  
931 -GGTGGCCATCAGCAAGGACGACAAGGGCAAGAAGGTGGCTACCAACAGCGTCCGCTGGACAACAACAA  
1000 -GGTGGCCATCAGCAAGGACGACAAGGGCAAGAAGGTGGCTACCAACAGCGTCCGCTGGACAACAACAA  
1069 -GGTGGCCATCAGCAAGGACGACAAGGGCAAGAAGGTGGCTACCAACAGCGTCCGCTGGACAACAACAA  
1138 -GGTGGCCATCAGCAAGGACGACAAGGGCAAGAAGGTGGCTACCAACAGCGTCCGCTGGACAACAACAA  
1206 End of repeats

Protein sequence: NP\_648775

120-GGHQQGRQGQGGYQQRPPGQQQ  
143-GGHQQGRQGQEGGYQQRPPGQQQ  
166-GGHQQGRQGQEGGYQQRPPGQQQ  
189-GGHQQGRQGQEGGYQQRPPGQQQ  
212-GGHQQGRQGQEGGYQQRPPGQQQ  
235-GGHQQGRQGQEGGYQQRPPGQQQ  
258-GGHQQGRQGQEGGYQQRPPGQQQ  
281-GGHQQGRQGQEGGYQQRPPGQQQ  
304-GGHQQGRQGQEGGYQQRPPGQQQ  
327-GGHQQGRQGQEGGYQQRPPGQQQ  
350-GGHQQGRQGQEGGYQQRPPGQQQ-372 End of repeats

*Apis Mellifera*, GeneID411577

partial mRNA: XM\_395048

START 376-

AGTCCTCAACAAGGACAGACATATGATCAACAACAACAACATAGTTTCACGCAACAATCACATAGTCAAAAGCAACAGTCAAT  
AGTCCTCAGCAACAAGCATGGAACTTAATCAACAACAACAACAAGTTACCGCAACAACCACATAGTCAAAGGCAACAGTTGGAT  
AGTCCTCAGCAACAAGCATGGAGACTTAATCAGCAACAACAACAAGTTACCGCAACAACCACATAGTCAAAGCAACAATCGAAT  
AGTCCTCAGCAACAAGCATGGAACTTAATCAACAACAACAACAAGTTACCGCAACAACCACATAGTCAAAGGCAACAGTCAAT  
AGTCCTCAGCAACAAGCATGGAACTTAATCAACAACAACAACAAGTTACCGCAACAACCACATAGTCAAAGGCAACAGTCAAT  
AGTCCTCAGCAACAAGCATGGAGACTTAATCAGCAACAACAACAACAAGTTACCGCAACAACCACATAGTCAAAGCAACAATCGAAT  
T AGTCCTCAGCAACAAGTACGGAGACTTAATCAACAACAACAACAAGTTACCGCAACAACCACATAGTCAAAGGCAACAGTCAAT  
AGTCCTCAGCAACAAGCATGGAACTTAATCAACAACAACAACAAGTTACCGCAACAACCACATAGTCAAAGGCAACAGTCAAT  
AGTCCTCAGCAACAAGTATGGAGACTTAATCAACAACAACAACAACAATATTCACCAACAAGTTAGTATCTCACATCAACAATA  
- 1248 END of repeats

Protein: XP\_395048

START 60- SPQQQGQTYDQQQQHSSSQSHSQKQQSN  
SPQQQAWKLNQQQQQSSPQQPHSQRQQLD  
SPQQQAWRLNQQQQQSSPQQPHSQRQQSN  
SPQQQVRRPNQQQQYSSPQQSHSQRQQSN  
SPQQQAWKLNQQQQQSSPQQPHSQRQQSN  
SPQQQAWRLNQQQQQSSPQQPHSQRQQLN  
SPQQQAWRLNQQQQQSSPQQPHSQRQQSN  
SPQQQVRRPNQQQQYSSPQQSHSQRQQSN  
SPQQQAWKPNQQQQQSSPQQPHCQRQQSN  
spqqqvwrrpnqqqqqhnsppqqsvisshqqi - 350 end of repeats
